# Supplementary material for: Formation of in situ HVPE a-plane GaN nanodots: effects on the structural properties of a-plane GaN templates
Source: Royal Society of Chemistry journal article supplement (doi:10.1039/c8ce00583d), 2018-01-01
Supplement: c8ce00583d1.pdf [file c8ce00583d1.pdf]

## **Electronic supplementary information**

### **Formation of in-situ HVPE a-plane GaN nanodot: Effects on the structural properties of a-plane GaN template**

**Moonsang Lee<sup>a, †</sup>, Mino Yang<sup>b</sup>, Jung-Sub Wi, and Sungsoo Park<sup>c, d, †</sup>**

*<sup>a</sup>Korea Basic Science Institute, Daejeon, 169-148, Republic of Korea*

*<sup>b</sup>Korea Basic Science Institute, Seoul Center, Seoul, 5, Republic of Korea*

*<sup>c</sup>Center for Nano-Bio Measurement, Korea Research Institute of Standards and Science,  
267 Gajeong-ro, Yuseong-gu, Daejeon 34113, Republic of Korea*

*<sup>d</sup>Jeonju University, Department of Science Education, Jeonju, 303, Republic of Korea*

*<sup>e</sup>Jeonju University, Analytical Laboratory of Advanced Ferroelectric Crystals, Jeonju, 303,  
Republic of Korea*

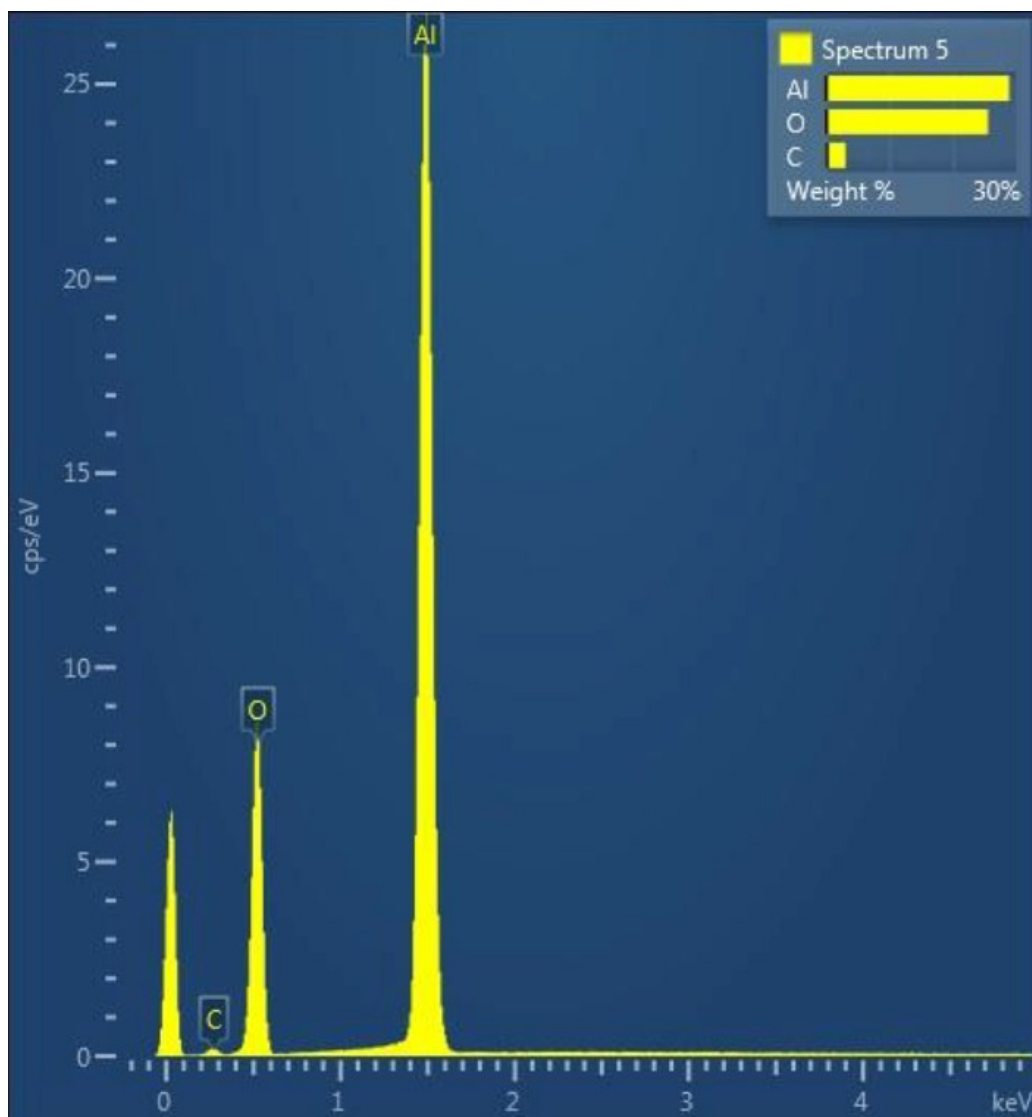

| Element | Line Type | Apparent Concentration | Wt%   | Atomic % |
|---------|-----------|------------------------|-------|----------|
| C       | K series  | 0.36                   | 3.11  | 8.86     |
| O       | K series  | 26.53                  | 25.52 | 54.57    |
| Al      | K series  | 28.86                  | 28.83 | 36.56    |
| Total:  |           |                        | 57.47 | 100.00   |

**Fig. S1** EDX analysis of bare sapphire substrate without any surface treatment. Reproduced from Ref. 19 with permission from the Royal Society of Chemistry.
